# Supplementary material for: Local PM2.5 Hotspot Detector at 300 m Resolution: A Random Forest–Convolutional Neural Network Joint Model Jointly Trained on Satellite Images and Meteorology
Source: MDPI journal article supplement (doi:10.3390/rs13071356), 2021-04-01
Supplement: s1 [file s1]

# Supplementary Materials: Local PM<sub>2.5</sub> Hotspot Detector at 300 m Resolution: A Random Forest-Convolutional Neural Network Joint Model Jointly Trained on Satellite Images and Meteorology

Tongshu Zheng, Michael Bergin, Guoyin Wang and David Carlson

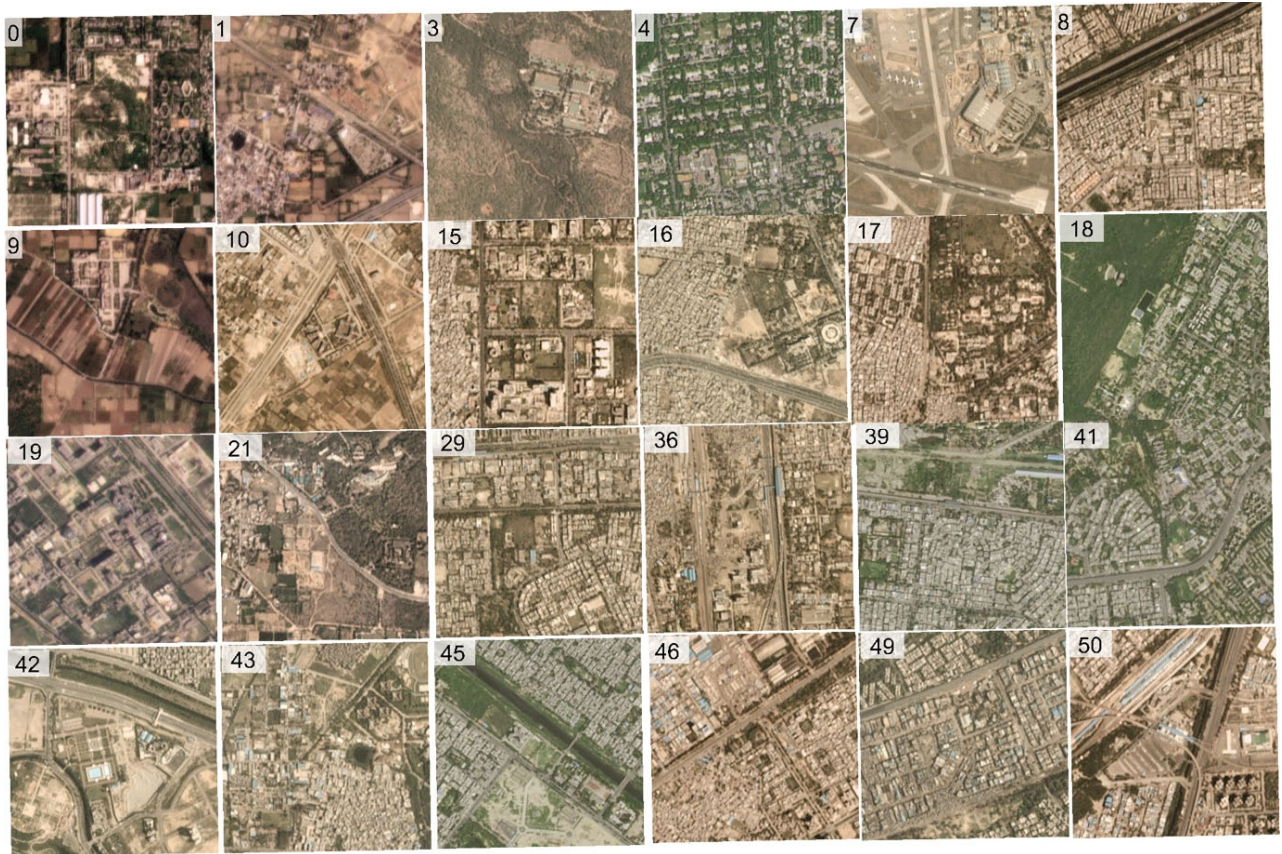

**Figure 1.** Example satellite image for each of the 24 training air quality monitoring (AQM) stations in Delhi to show the range of urban land covers that the model is trained on. The site numbers from Table 1 are superimposed on the images.



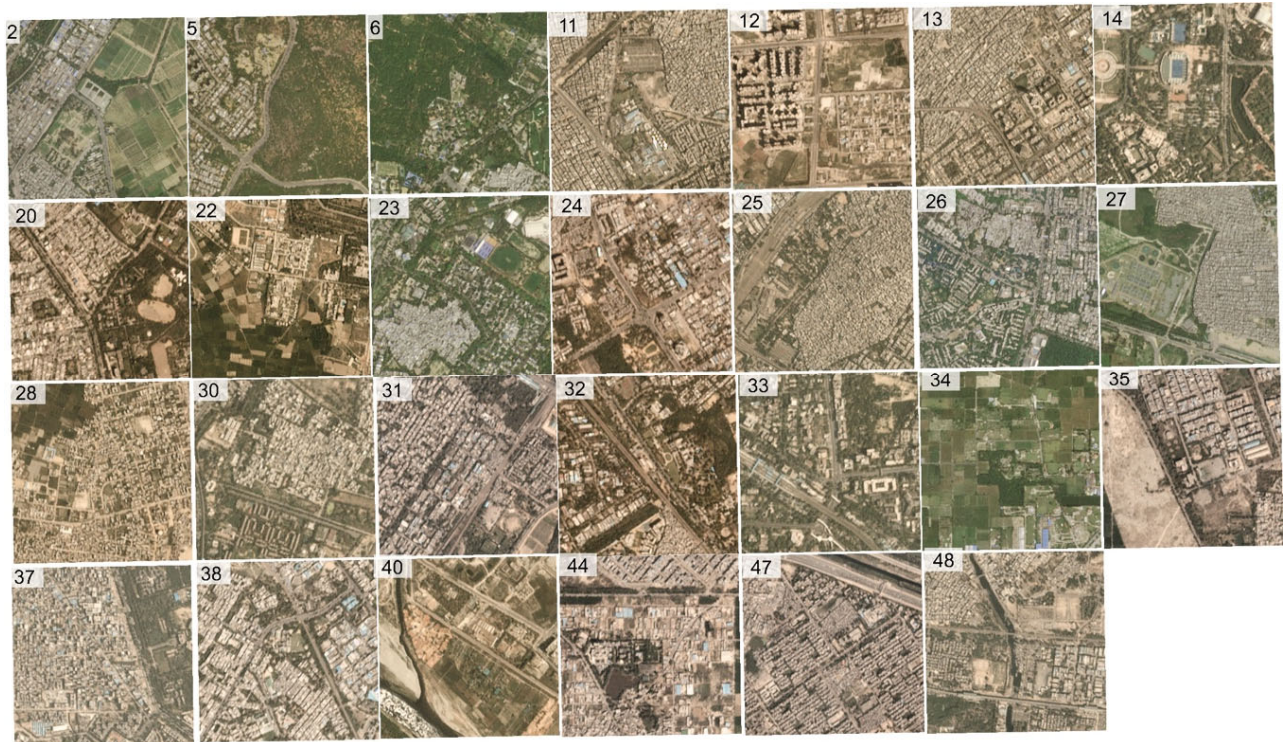

**Figure S2.** Example satellite image for each of the 27 test AQM stations in Delhi to show the range of urban land covers that the model is tested on. The site numbers from Table 1 are superimposed on the images.

<http://doi.org/10.5281/zenodo.4632463>

**Video S1.** Temporal evolution of all the images used in the model training at an example training site #18 Mandir Marg (the training site that has the most samples) in chronological order.

<http://doi.org/10.5281/zenodo.4632463>

**Video S2.** Temporal evolution of all the images used in the model testing at an example test site #37 NSIT Dwarka (the test site that has the most samples) in chronological order.

<http://doi.org/10.5281/zenodo.4632463>

**Video S3.** A video that shows the RF-CNN-predicted daily PM<sub>2.5</sub> maps of Delhi on the most trustworthy 43 days in Figure F1 frame by frame.
